# Supplementary material for: New Platinum(II) Complexes Affecting Different Biomolecular Targets in Resistant Ovarian Carcinoma Cells
Source: PubMed Central journal article supplement — ChemMedChem. 2021 Apr 6;16(12):1956–66. doi: 10.1002/cmdc.202100075 (PMC8252049; doi:10.1002/cmdc.202100075), 2021-04-06
Supplement: CMDC-16-1956-s001.pdf [file CMDC-16-1956-s001.pdf]

# ChemMedChem

Supporting Information

## **New Platinum(II) Complexes Affecting Different Biomolecular Targets in Resistant Ovarian Carcinoma Cells**

Mariafrancesca Hyeraci<sup>+</sup>, Valeria Scalcon<sup>+</sup>, Alessandra Folda, Luca Labella, Fabio Marchetti, Simona Samaritani, Maria Pia Rigobello,\* and Lisa Dalla Via\*

## Table of contents

- Figure S1.  $^1\text{H}$  NMR spectrum of complex **1** ( $\text{CDCl}_3$ )
- Figure S2.  $^{13}\text{C}$  NMR spectrum of complex **1** ( $\text{CDCl}_3$ )
- Figure S3.  $^{31}\text{P}$  NMR spectrum of complex **1** ( $\text{CDCl}_3$ )
- Figure S4.  $^{195}\text{Pt}$  NMR spectrum of complex **1** ( $\text{CDCl}_3$ )
- Figure S5.  $^1\text{H}$  NMR spectrum of complex **2** ( $\text{CDCl}_3$ )
- Figure S6.  $^{13}\text{C}$  NMR spectrum of complex **2** ( $\text{CDCl}_3$ )
- Figure S7.  $^{31}\text{P}$  NMR spectrum of complex **2** ( $\text{CDCl}_3$ )
- Figure S8.  $^{195}\text{Pt}$  NMR spectrum of complex **2** ( $\text{CDCl}_3$ )
- Figure S9.  $^{31}\text{P}$  NMR spectrum of complex **1** ( $\text{DMSO}/\text{D}_2\text{O}$  92/8 v/v)
- Figure S10: Determination of lipid peroxidation in treated cells.

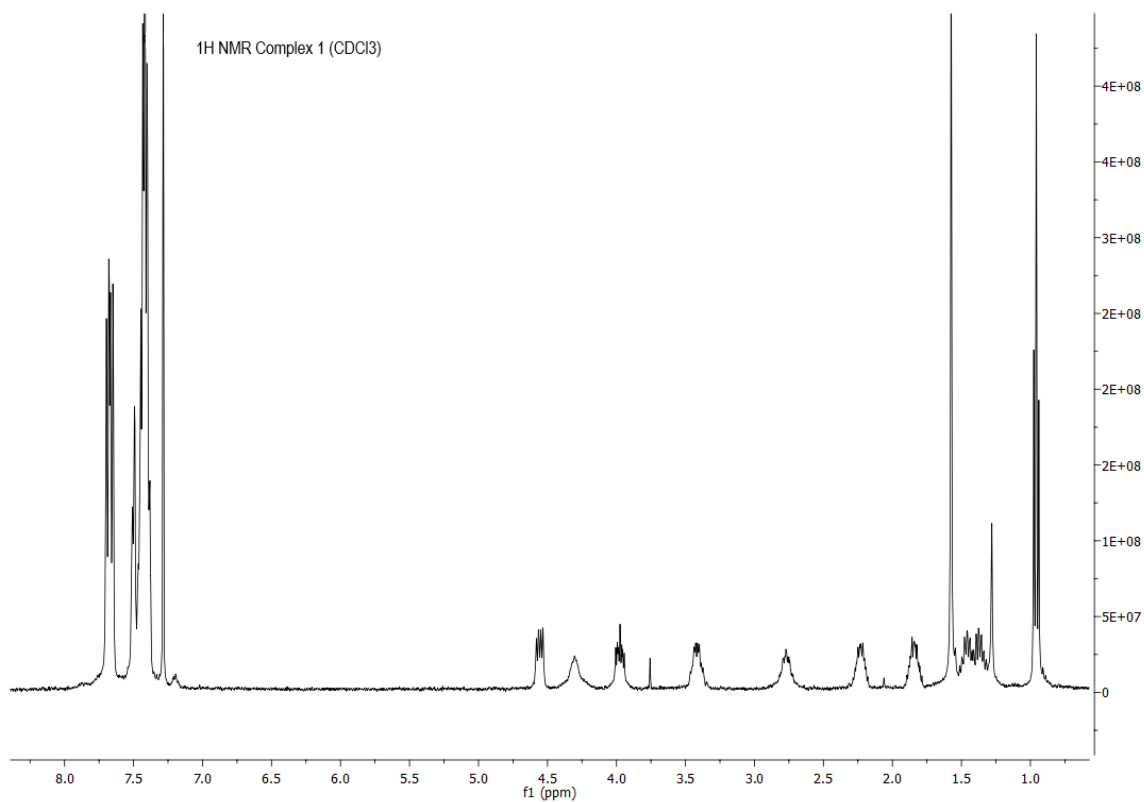

**Figure S1.**  $^1\text{H}$  NMR spectrum of complex **1** ( $\text{CDCl}_3$ )

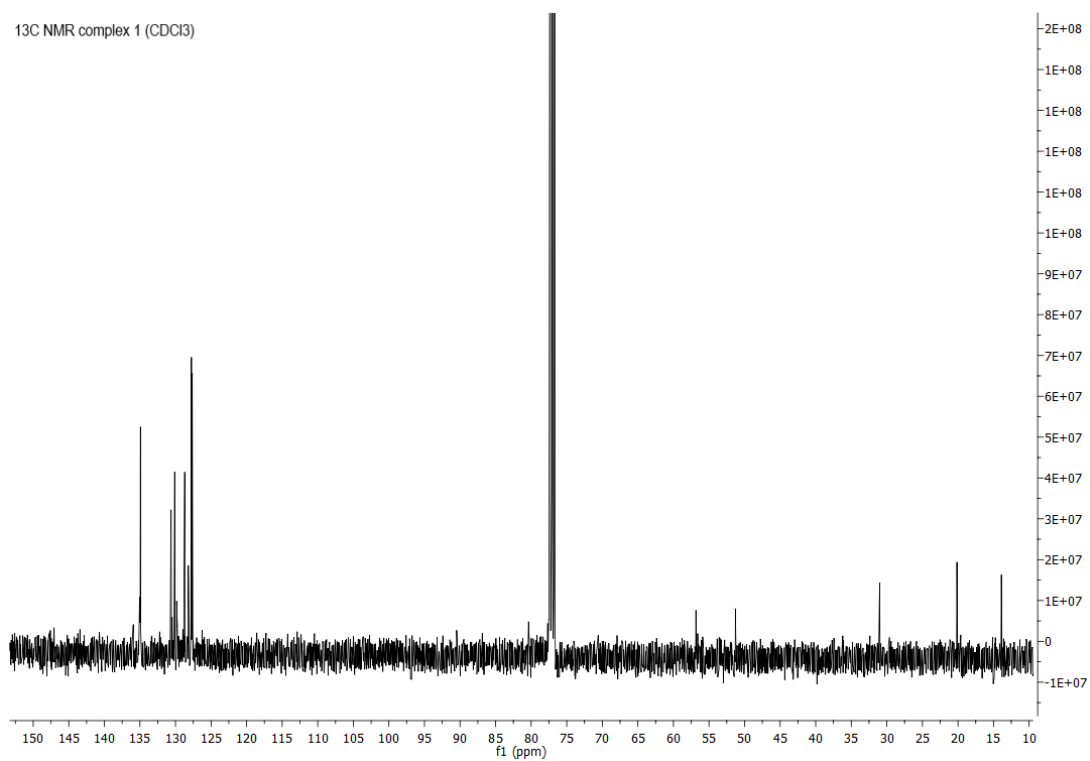

**Figure S2.**  $^{13}\text{C}$  NMR spectrum of complex **1** ( $\text{CDCl}_3$ )

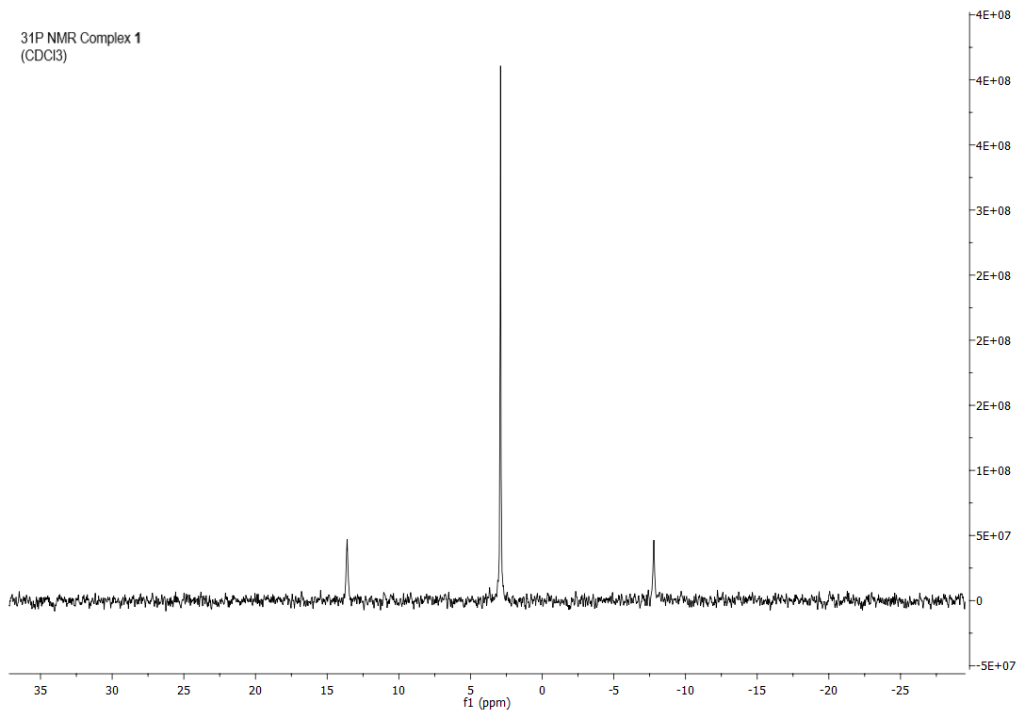

**Figure S3.** <sup>31</sup>P NMR spectrum of complex **1** (CDCl<sub>3</sub>)

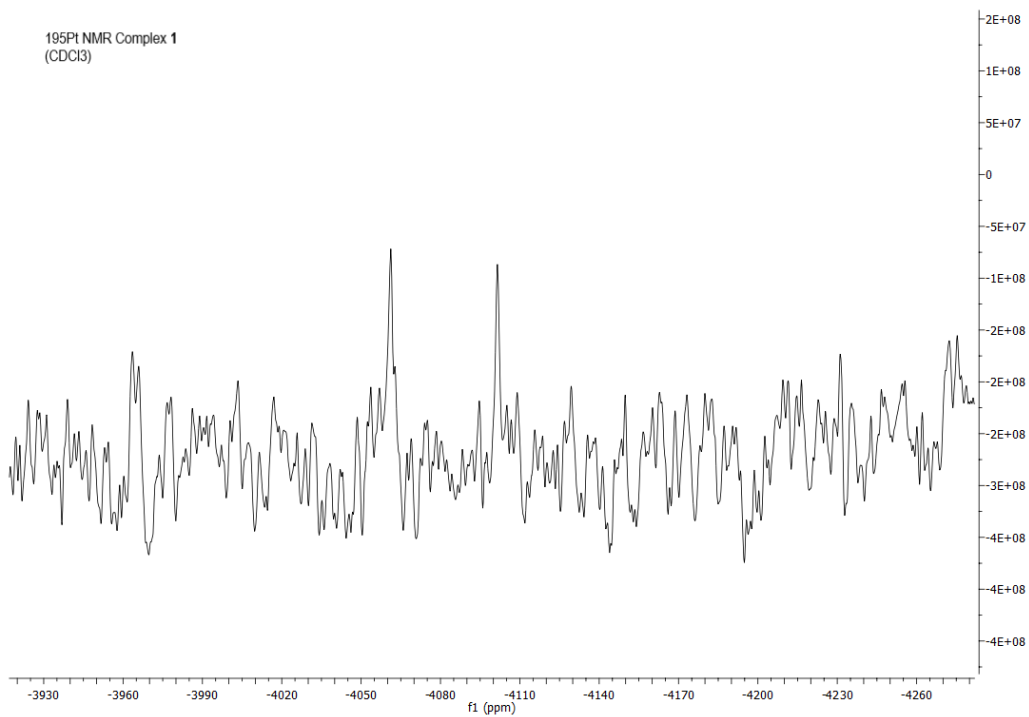

**Figure S4.** <sup>195</sup>Pt NMR spectrum of complex **1** (CDCl<sub>3</sub>)

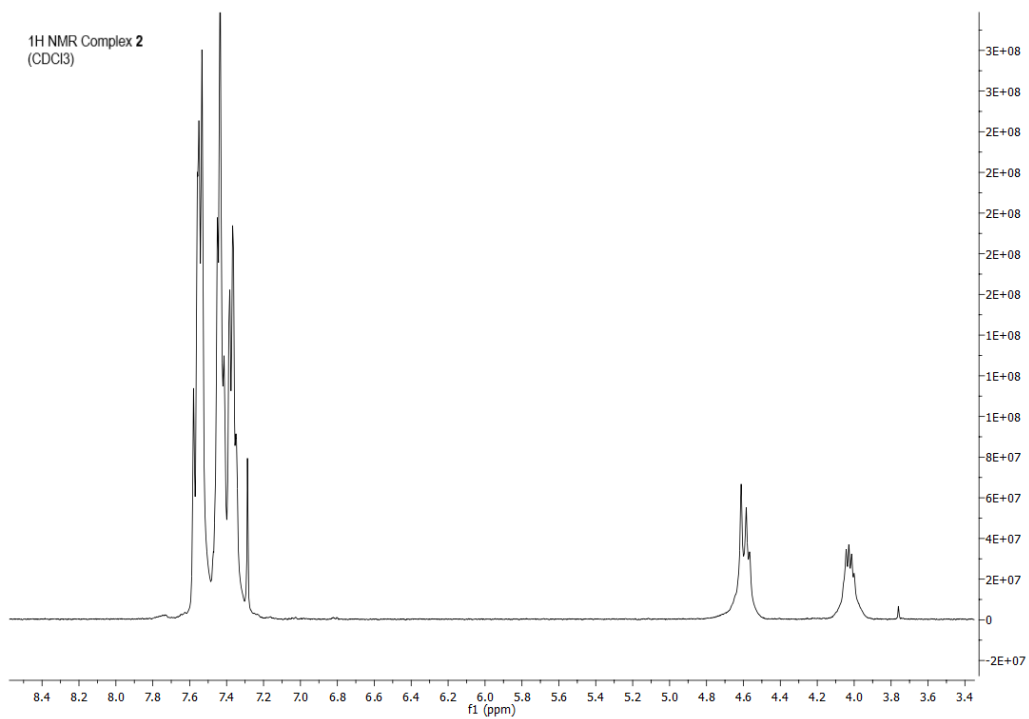

**Figure S5.** <sup>1</sup>H NMR spectrum of complex 2 (CDCl<sub>3</sub>)

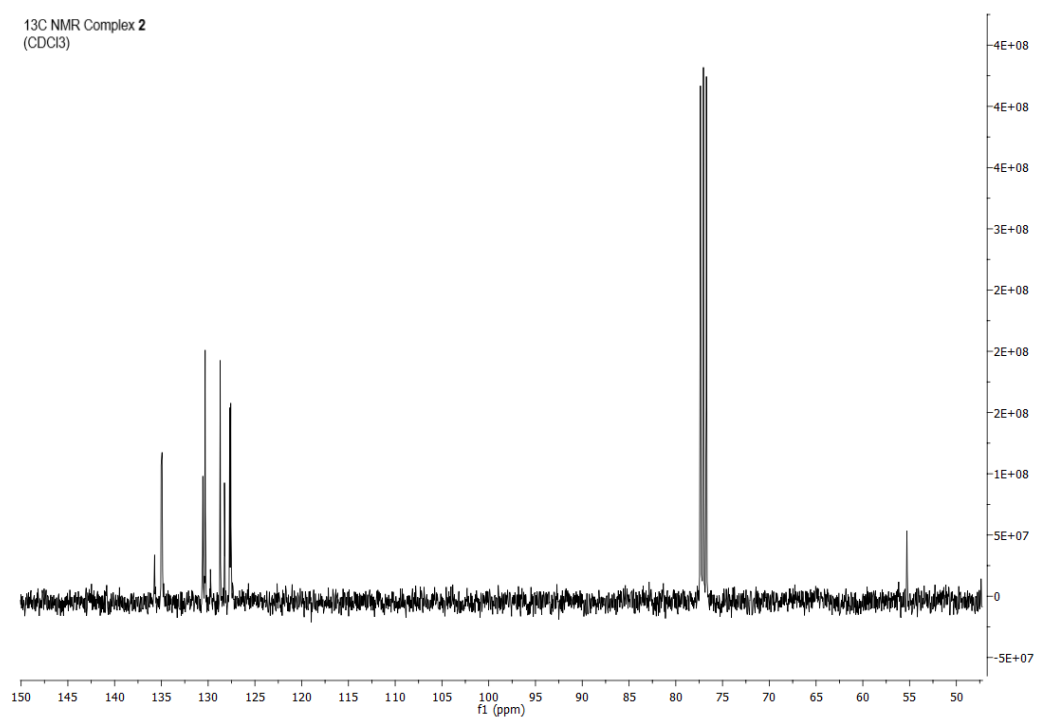

**Figure S6.** <sup>13</sup>C NMR spectrum of complex 2 (CDCl<sub>3</sub>)

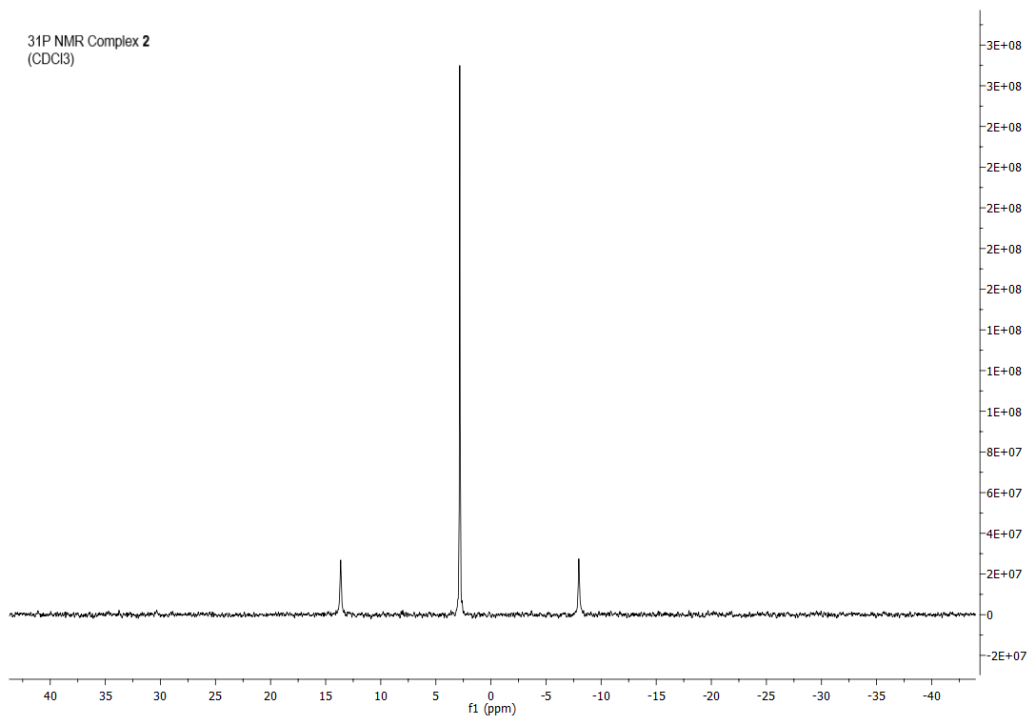

**Figure S7.** <sup>31</sup>P NMR spectrum of complex 2 (CDCl<sub>3</sub>)

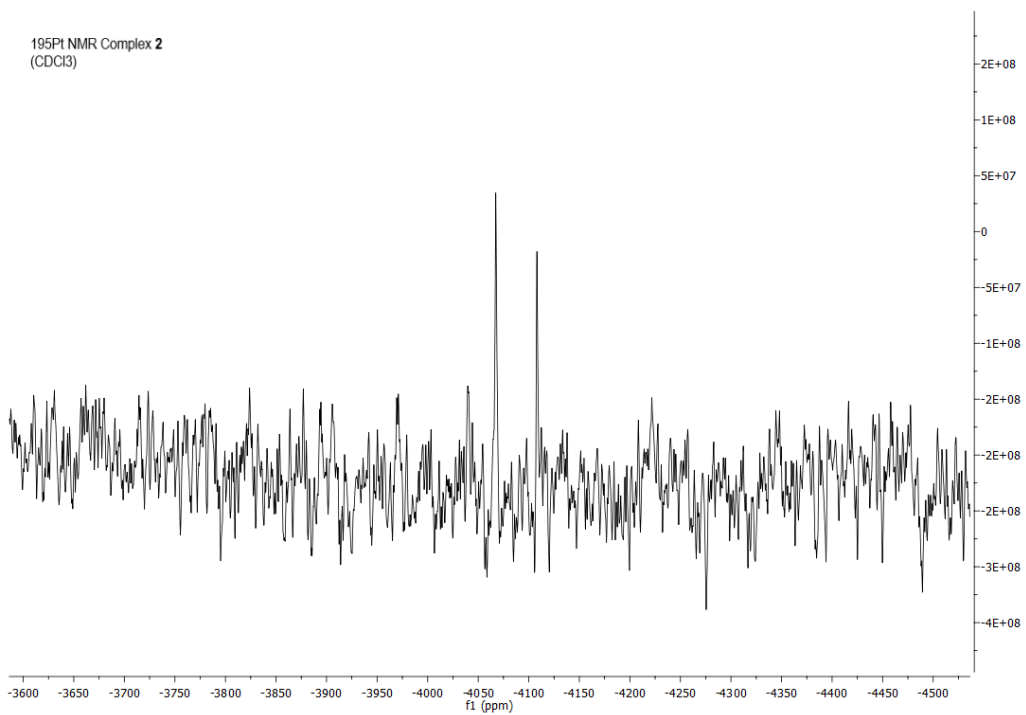

**Figure S8.** <sup>195</sup>Pt NMR spectrum of complex 2 (CDCl<sub>3</sub>)

$^{31}\text{P}$  NMR complex **1**. Solvent: DMSO- $d_6$ /D $_2$ O 92/8 v/v

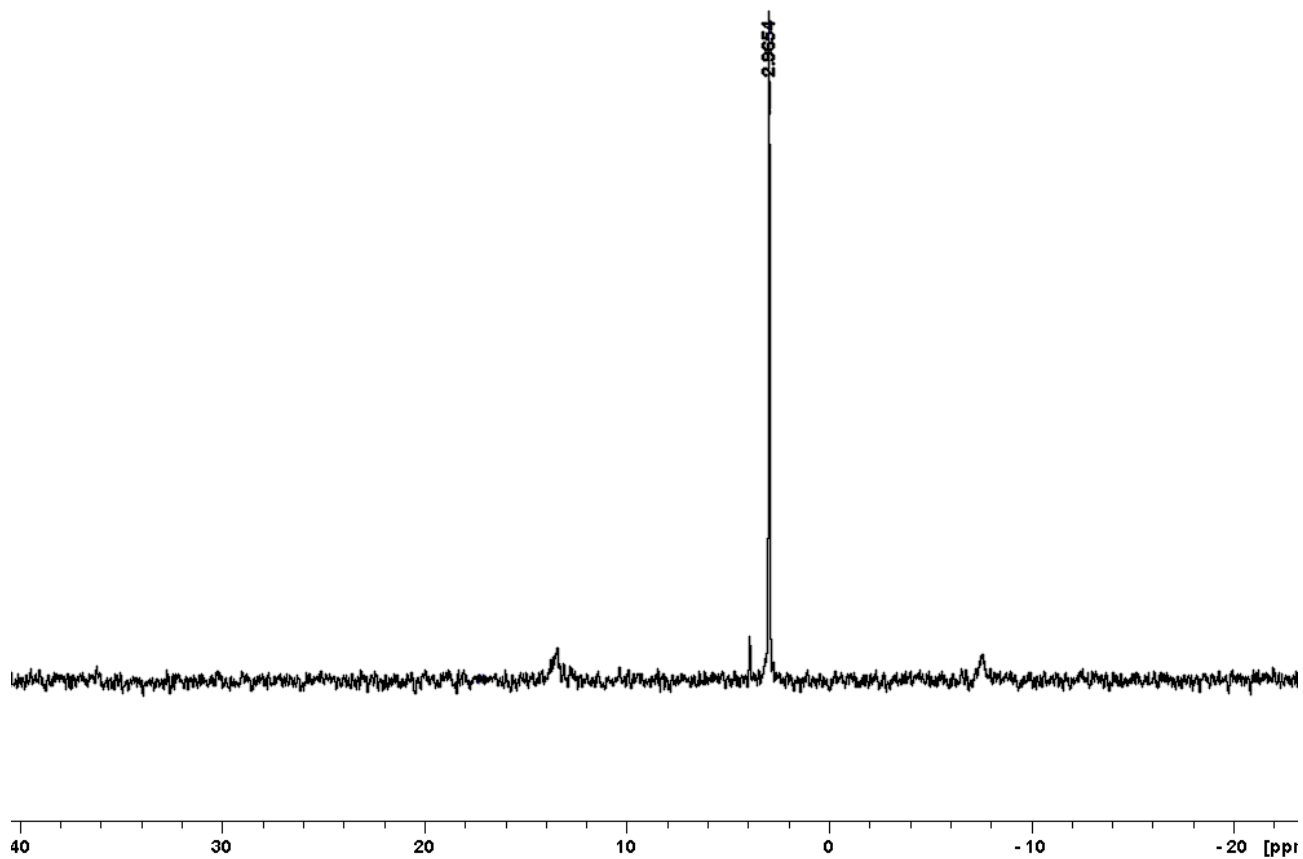

**Figure S9.**  $^{31}\text{P}$  NMR spectrum of complex **1** (DMSO/D $_2$ O 92/8 v/v). Higher concentrations of water caused precipitation of **1**. Superimposable spectra were registered after 24 and 48 h.

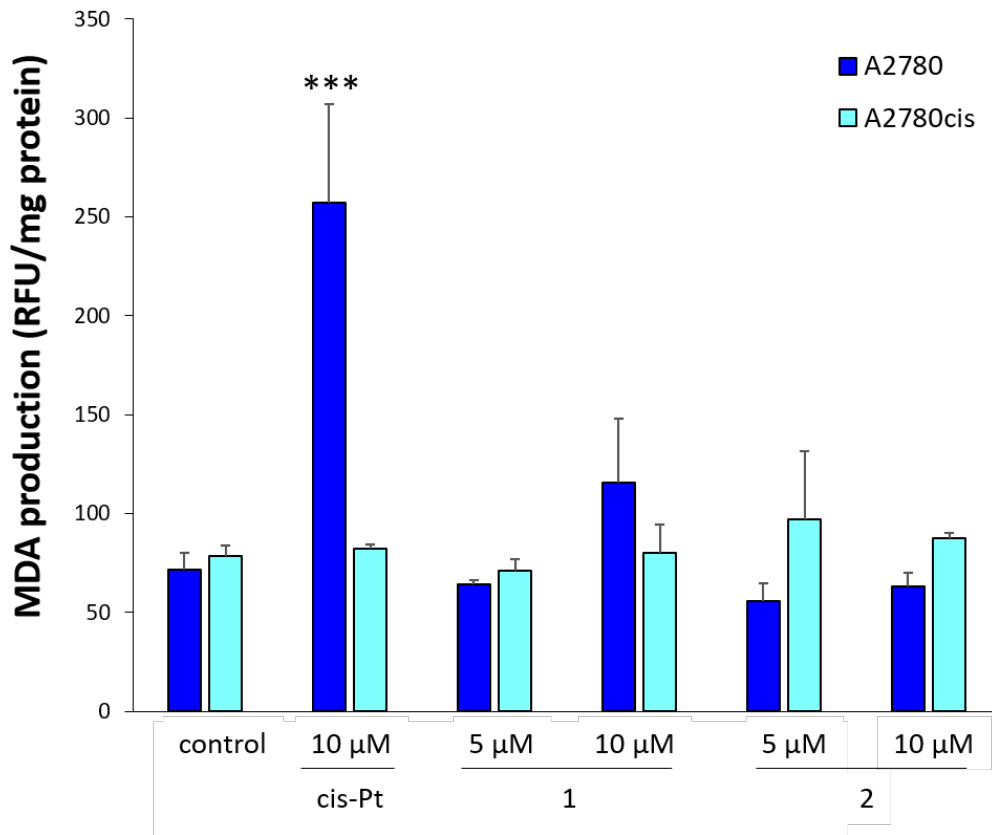

**Figure S10.** Determination of lipid peroxidation in treated cells. Lipid peroxidation was measured as MDA production in A2780 and A2780cis cells treated with 5 and 10 μM 1 and 2 or 10 μM cis-Pt for 48 h with refresh after 24 h (see Experimental Section for details). \*\*\* p<0.001.
